# Supplementary material for: Bidirectional Microbiome-Gut-Brain-Axis Communication Influences Metabolic Switch-Associated Responses in the Mosquito Anopheles culicifacies
Source: MDPI journal article supplement (doi:10.3390/cells11111798), 2022-05-31

## **Supporting Information**

### **Bidirectional Microbiome-Gut-Brain-Axis Communication Influences Metabolic Switch-associated Responses in the Mosquito *Anopheles culicifacies***

Tanwee Das De <sup>1,2†</sup>, Punita Sharma<sup>1†</sup>, Sanjay Tevatiya<sup>1</sup>, Charu Chauhan<sup>1</sup>, Seena Kumari<sup>1</sup>, Pooja Yadav, Deepak Singla<sup>1,2</sup>, Vartika Srivastava<sup>1</sup>, Jyoti Rani<sup>1</sup>, Yasha Hasija<sup>3</sup>, Kailash C Pandey<sup>1</sup>, and Rajnikant Dixit <sup>1\*</sup>.

<sup>1</sup>Laboratory of Host-Parasite Interaction Studies, National Institute of Malaria Research, Sector-8, Dwarka, Delhi 110077, India.

<sup>2</sup> Department of Biology, Indian Institute of Science Education and Research, Dr. Homi Bhabha Road, Pashan, Pune 411008, Maharashtra, India

<sup>3</sup> School of Agricultural Biotechnology, Punjab Agricultural University, Ludhiana, Punjab 141027, India

<sup>4</sup> Department of Biotechnology, Delhi Technological University. Shahbad Daultpur, Main Bawana Road, Delhi 110042, India;

\*Correspondence: [dixitrk@mrcindia.org](mailto:dixitrk@mrcindia.org)

†These authors contributed equally to this work.

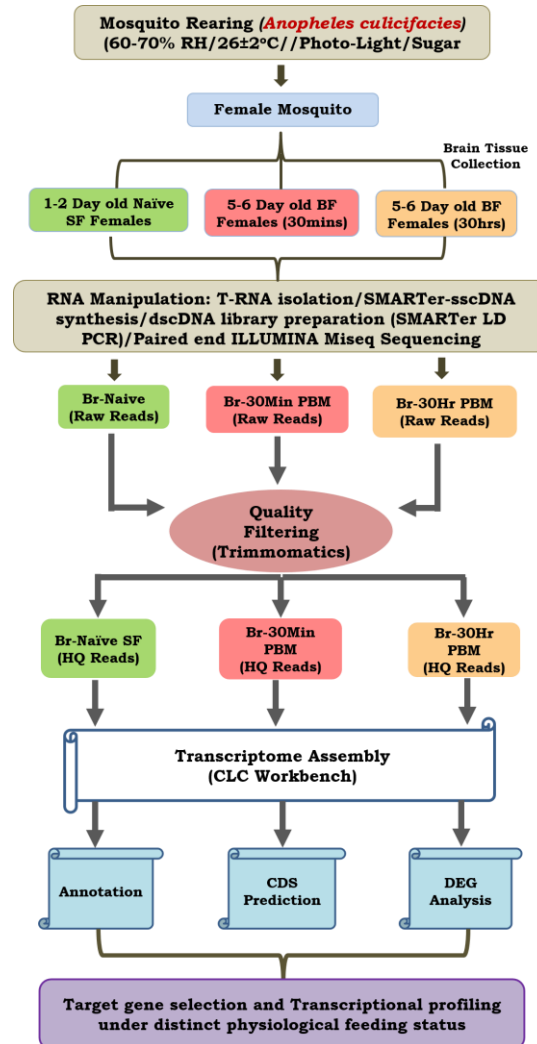

**Figure S1.** A technical overview to decode the hard-wired genetic structure of brain system of *Anopheles culicifacies* mosquito.

**Table S1. Validation DGE data.**

| <b>Gene Name</b>                                        | <b>Transcriptome data/DEG</b>                          | <b>Real Time Validation</b>                                                  |
|---------------------------------------------------------|--------------------------------------------------------|------------------------------------------------------------------------------|
| serine/threonine-protein kinase (STPK)                  | Br_30hr = -1.2-Fold Down<br>Br-30min = - 5.7-Fold Down | 10hr = Upregulation<br>30min and 30hr =<br>Downregulation                    |
| Neurotransmitter gated ion channel (NTGIC)              | No Change                                              | No Change                                                                    |
| Glycine receptor (Gly Receptor)                         | No Change                                              | No Change                                                                    |
| Gamma-aminobutyric acid type B receptor (GABA Receptor) | Br_30hr = -1.1-fold down<br>Br_30min = -0.27-Fold Down | 10hr = Non-significant<br>Upregulation<br>30min and 30hr =<br>Downregulation |
| Glutamate receptor (Glut Receptor)                      | No Change                                              | No Change                                                                    |
| phosphatidylinositol-Phospholipase C gamma (PLC)        | Br-30hr = -0.2-Fold Down<br>Br-30min = -0.13-Fold Down | 10hr = Upregulation<br>30min and 30hr =<br>Downregulation                    |

**Table S2. List of Primer Sequence used in the study.**

| Sl. No. | Primer Name and Sequence                                                                                         |
|---------|------------------------------------------------------------------------------------------------------------------|
| 1.      | Actin_Fw: 5' TCGTGACATCAAGGAGAAG 3'<br>Actin_Rev: 5' GATTCCATACCCAGGAACGA 3'                                     |
| 2.      | Ac_PyruvateKinase_Fw: 5' CGCACTTGATCTCCAAGTAT 3'<br>Ac_PyruvateKinase_Rev: 5' TTCCAGCCAGTAACAACAA 3'             |
| 3.      | Ac_Solute Carrier 7_Fw: 5' TCAATAGCTCCGAAATCAGT 3'<br>Ac_Solute Carrier 7_Rev: 5' TGATAACGAACAGCAAGACA 3'        |
| 4.      | Ac_AATransporter_Fw: 5' CAATGCCTATGGTTACAGGT 3'<br>Ac_AATransporter_Rev: 5' GCTGGTAAGTGTCTTCTTG 3'               |
| 5.      | Ac_TrehalaseTransporter_Fw: 5' CGATGGGACTGTACTTCTTC 3'<br>Ac_TrehalaseTransporter_Rev: 5' GTCTAGATCGGCGAAAAAC 3' |
| 6.      | Ac_PGC1_Fw: 5' ACCTTACGGTAAAATCGTCA 3'<br>Ac_PGC1_Rev: 5' GTACGGTAGCTGATGTTTCGT 3'                               |
| 7.      | Ac_OxoglutarateDHS_Fw: 5' GCAACTACTTCCATCTGCTC 3'<br>Ac_OxoglutarateDHS_Rev: 5' GAGCCTTCAACAAGTCGTAA 3'          |
| 8.      | cGMP PK_Fw: 5' GCGTTTGATTATCTGCACTC 3'<br>cGMP PK_Rev: 5' AAGGACTCCAAGTGACCAGT 3'                                |

|            |                                                                                                          |
|------------|----------------------------------------------------------------------------------------------------------|
| <b>9.</b>  | GlutamateR_Fw: 5'AGTGGTATCAACGCAGAGTG 3'<br>GlutamateR_Rev: 5' GAGTTTAAGCACTGCTCCAC 3'                   |
| <b>10.</b> | Glycine R_Fw: 5' GATACTGCCACTACCTCGTC 3'<br>Glycine R_Rev: 5' CTTGGAGACCGAATTGAATC 3'                    |
| <b>11.</b> | GABA R_Fw: 5' CAGAACGAAGAAGGCTACTC 3'<br>GABA R_Fw: 5' AGTATCCACGCATACTCAGC 3'                           |
| <b>12.</b> | ARMAA_Decarboxylase_Fw: 5'GGTAACCAAGTCCTTCAGTG 3'<br>ARMAA_Decarboxylase_Rev: 5' TAGAACAGACGACCTCGAAC 3' |
| <b>13.</b> | ILP1_Fw: TCCACTACATGGAAAACTCC<br>ILP1_Rev: GTCATCAGTGCCTGGTAGAT                                          |
| <b>14.</b> | ILP3_Fw: TAGCAATGATGAGTGGATGA<br>ILP3_Rev: ACAACACTCCTCTACGATGC                                          |
| <b>15.</b> | Leukokinin_Fw: AAACATCGCATAGCAGAGAT<br>Leukokinin_rev: TCAGATAATCCTGCACCATA                              |
| <b>16.</b> | NRY_Fw: TACTGTACGGCTGGTTGAAT<br>NRY_Rev: TTAGTTCCGGCAGTGTTTC                                             |
| <b>17.</b> | OEH_Fw: GACAAGAATGCGGTGATAAT<br>OEH_Rev: CGTTGCTGTAGTAATCGAAG                                            |
| <b>18.</b> | DH44R1_Fw: CTCGAAATAGAATGCTCCTG<br>DH44R1_Rev: AGATGACGATGAGGTAGGTG                                      |

|            |                                                                                       |
|------------|---------------------------------------------------------------------------------------|
| <b>19.</b> | LKR_Fw: AAGAGGGAACACGACAAAC<br>LKR_Rev: GCTCGATATAATTGGTGGTC                          |
| <b>20.</b> | DH44_Fw: AACGAACAGGAAGATCTCAA<br>DH44_Rev: ATACCGTAGACGTACCGTGA                       |
| <b>21.</b> | CCHAR2_Fw: CCACTCCGAAAACACTACAGAC<br>CCHAR2_Rev: GTGGCAGGAAGTAGTAAACG                 |
| <b>22.</b> | V-Type ATPase_Fw: TTACATGTACACCGATTTGG<br>V-Type ATPase_Rev: GACTTCATCAGACGTGACAG     |
| <b>23.</b> | DopR_Fw:5' GTTATGGGCGTGTTTATTGT 3'<br>DopR_Rev:5' GCTGGTACTTGCGTCTTATC 3'             |
| <b>24.</b> | AKT Kinase_Fw: GATGGAGGAGGTAAAGTTCC<br>AKT Kinase_Rev: GAACTCACGGTCGAAGTAAC           |
| <b>25.</b> | CYP314A1_Fw: GAGATTGCGCAAGAATTTAG<br>CYP314A1_Rev: GGAAGTTGTCCTCACTCTGA               |
| <b>26.</b> | PTTH_Fw: CTTACCTCTGAATTGCTTC<br>PTTH_Rev: ACAAGAAGACGGGTACTGTG                        |
| <b>27.</b> | KDNaCaExchanger_Fw: GTGAGATGGGTATCAGCAAC<br>KDNaCaExchanger_Rev: CTTCCAATCAAGTTTGAAGC |

|            |                                                                                                          |
|------------|----------------------------------------------------------------------------------------------------------|
| <b>28.</b> | GABA ClCh_Fw: 5' GGAAGGTGTTTGGTAAGTCA 3'<br>GABA ClCh_Rev: 5' GGTGATCGTGTTTCGAGTAAT 3'                   |
| <b>29.</b> | PLC_Fw: 5' TGGATTCGTCCAACATCAT 3'<br>PLC_Rev: 5' TTCACGATCACCTCGTTC 3'                                   |
| <b>30.</b> | PI-4Kinase_Fw: 5' ACATCATCTCCTCACTGTCC 3'<br>PI-4Kinase_Rev: 5'GTGTGCCACTGTTGTAATCA 3'                   |
| <b>31.</b> | ST ProteinKinase_Fw: 5'TTTATAGTGCCGTGTGTTGA 3'<br>ST ProteinKinase_Rev: 5'CTTAATGTGGAACCGATCAT 3'        |
| <b>32.</b> | Trehalase_Fw: 5' GAAGAGGACAAACAGGACTA 3'<br>Trehalase_Rev: 5' GTTCCGGTAACCATAGAAC 3'                     |
| <b>33.</b> | 5-HT Receptor_Fw: 5' ATGATCTCGCGTAACTCCTC 3'<br>5-HT Receptor_Rev: 5' ATCGGATTGACCAGACTGC 3'             |
| <b>34.</b> | TOR_Fw: GTAGAATGTTGGTGGTCGAT<br>TOR_Rev: ACCATCTGCTAGGTTATTGC                                            |
| <b>35.</b> | Octopamine Receptor_Fw: 5'CTACTGGCGGATCTATCGGG 3'<br>Octopamine Receptor_Rev: 5' TGGTGGAAGGCTGTGTTTTG 3' |
| <b>36.</b> | Calcitonin R_Fw: AATAGAATGCTGGATGAACG<br>Calcitonin R_Rev: GGACGAAACGGTGTAAGTAT                          |

|     |                                                                                               |
|-----|-----------------------------------------------------------------------------------------------|
| 37. | NTGated IonCh_Fw: 5' ACGTTTCGAAAGTCAAACAC 3'<br>NTGated IonCh_Rev: 5' GCTGTAGAATGCACAAATGA 3' |
|-----|-----------------------------------------------------------------------------------------------|

**Table S3a. Annotation kinetics of RNA-Seq data.**

| <b>Molecular Features</b>        | <b>Ac-Br-Naive</b> | <b>Ac-Br-30M PBM</b> | <b>Ac-Br-30Hr PBM</b> |
|----------------------------------|--------------------|----------------------|-----------------------|
| <b>Total No. of Raw Reads</b>    | 5268211            | 3947521              | 3760078               |
| <b>Total No. of Contigs</b>      | 32118              | 32984                | 38512                 |
| <b>Total Transcripts</b>         | 9460               | 9146                 | 7387                  |
| <b>Total BLASTx hits (NR)</b>    | 8,668 (~91%)       | 8,336 (~91%)         | 6,548 (~88%)          |
| <b>Transcripts with GO Match</b> |                    |                      |                       |
| <b>Molecular Function</b>        | 4773               | 4556                 | 3575                  |
| <b>Biological process</b>        | 4446               | 4299                 | 3381                  |
| <b>Cellular component</b>        | 2523               | 2424                 | 1888                  |



**Table S3b. Percentage of differentially expressed transcripts.**

| Sample                     | No. of Transcripts    | Transcripts showing Differential gene Expression (DGE)       | Upregulated Transcripts | Downregulated Transcripts | Percentage of Transcripts showing DGE |
|----------------------------|-----------------------|--------------------------------------------------------------|-------------------------|---------------------------|---------------------------------------|
| Ac_Br_naive vs Ac_Br_30min | (9460 + 9146) = 18606 | Total - 4747<br>Significant – 3183<br>Not significant - 1564 | 622 (3%)                | 2110 (11%)                | 14% CDS show differential expression  |
| Ac_Br_Naive vs Ac_Br_30hr  | (9460 + 7387) = 16847 | Total -3966<br>Significant – 3174<br>Not significant - 792   | 482 (2%)                | 2469 (14%)                | 16 % show differential expression     |

**Table S4. Comparative alpha diversity indices estimation of gut-bacterial population of naïve sugar fed and blood fed mosquito *An. culicifacies*.**

| Sample   | Taxonomy Rank: Class        |               |
|----------|-----------------------------|---------------|
|          | Shannon index (H)/(h/LN(N)) | Simpson index |
| Ac_SF_MG | 3.233/0.6802                | 0.9081        |
| Ac_BF_MG | 2.815/0.6424                | 0.888         |

**Table S5. Quantitative estimation of 13 different neurotransmitters in the brain and the gut of mosquitoes under different physiological conditions.**

| Name of NT           | Control SF_Br | Ab+ SF BR | Control SF_MG | Ab+ SF MG | 10hr PBM_Br | Ab+ 10hr PBM_Br | 10hr PBM_MG | Ab+ 10hr PBM_MG | 24hr PBM_Br | Ab+ 24hr PBM_Br | 24hr PBM_MG | Ab+ 24hr PBM_MG |
|----------------------|---------------|-----------|---------------|-----------|-------------|-----------------|-------------|-----------------|-------------|-----------------|-------------|-----------------|
| <b>Histidine</b>     | 607.77        | 622.52    | 356.52        | 469.70    | 397.58      | 1562.75         | DC          | 3672.30         | 550.28      | 908.02          | 1968.73     | DC              |
| <b>Serine</b>        | 182.75        | 176.07    | 167.62        | 134.24    | 182.04      | 318.04          | 798.51      | 2636.08         | 197.18      | 350.75          | 1034.20     | 2830.31         |
| <b>Histamine</b>     | 16.08         | 76.89     | 3.35          | 3.83      | 48.28       | 82.21           | 108.12      | 83.16           | 73.12       | 50.42           | 136.69      | 284.97          |
| <b>Aspartic Acid</b> | 272.35        | 96.74     | 115.69        | 24.02     | 209.89      | 143.05          | 1205.17     | 146.59          | 102.76      | 222.80          | 1312.08     | 2348.14         |
| <b>Glutamic Acid</b> | 604.78        | 255.68    | 513.97        | 397.82    | 523.25      | 425.24          | DC          | 4530.44         | 486.92      | 690.13          | DC          | DC              |
| <b>GABA</b>          | 300.01        | 240.89    | 6.38          | 14.50     | 174.40      | 300.76          | 153.31      | 72.01           | 175.86      | 321.81          | 126.79      | 13.94           |
| <b>Dopa</b>          | 1.06          | 1.94      | DC            | 2.00      | 1.45        | 2.04            | DC          | DC              | 2.08        | 1.84            | DC          | DC              |
| <b>Octopamine</b>    | 5.49          | 0.39      | BLQ           | BLQ       | 2.29        | 0.20            | NF          | DC              | 0.65        | 1.11            | NF          | NF              |
| <b>Tyrosine</b>      | 84.26         | 58.49     | 96.41         | 53.93     | 140.86      | 117.51          | DC          | DC              | 147.28      | 136.63          | DC          | 136.63          |
| <b>Dopamine</b>      | 1.12          | 0.28      | 0.13          | 0.46      | 1.00        | 0.62            | 69.17       | 26.02           | 1.06        | 0.83            | 11.59       | 25.18           |
| <b>Serotonin</b>     | 9.33          | 2.25      | 1.92          | 1.35      | 6.06        | 3.39            | 143.62      | 81.14           | 3.59        | 3.72            | 32.70       | 81.37           |
| <b>Tyramine</b>      | 0.08          | BLQ       | 0.05          | 0.06      | 0.10        | 0.05            | 4.06        | 1.73            | 0.07        | 0.05            | 0.90        | 0.22            |
| <b>Tryptophan</b>    | 21.84         | 68.84     | 11.59         | 16.44     | 36.93       | 74.66           | 1230.41     | 1054.85         | 41.40       | 40.70           | 2263.10     | 3650.53         |

\* BLQ= Below Limit of Quantitation

NF= Not Found

DC= Detected but not calculated due to the highly suppressed Internal Standard signal

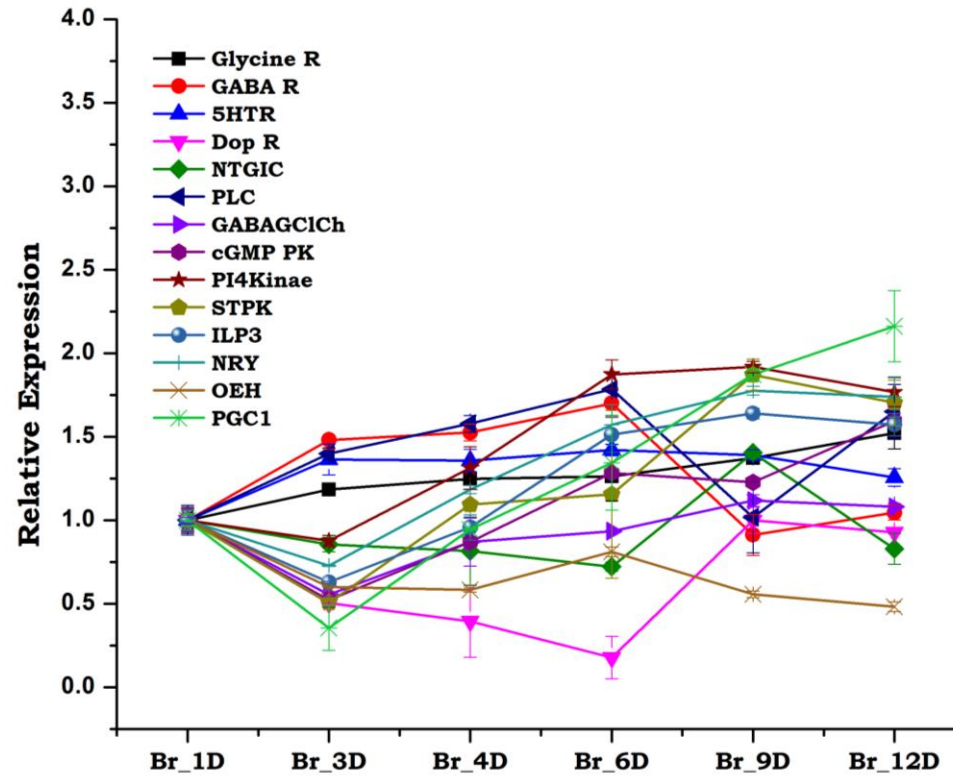

**Figure S2.** Differential gene expression analysis in aging non-blood fed female mosquito brain. No significant modulation of neuronal genes was observed when compared to 0-1-day old teneral mosquitoes with 12-day-old non-blood fed mosquitoes. Statistical analysis using two-way ANOVA followed by Tukey Test has implied at 0.05 level, the expression pattern of the respective genes was not statistically significant in aging mosquitoes ( $n = 25$ ,  $N = 3$ ).

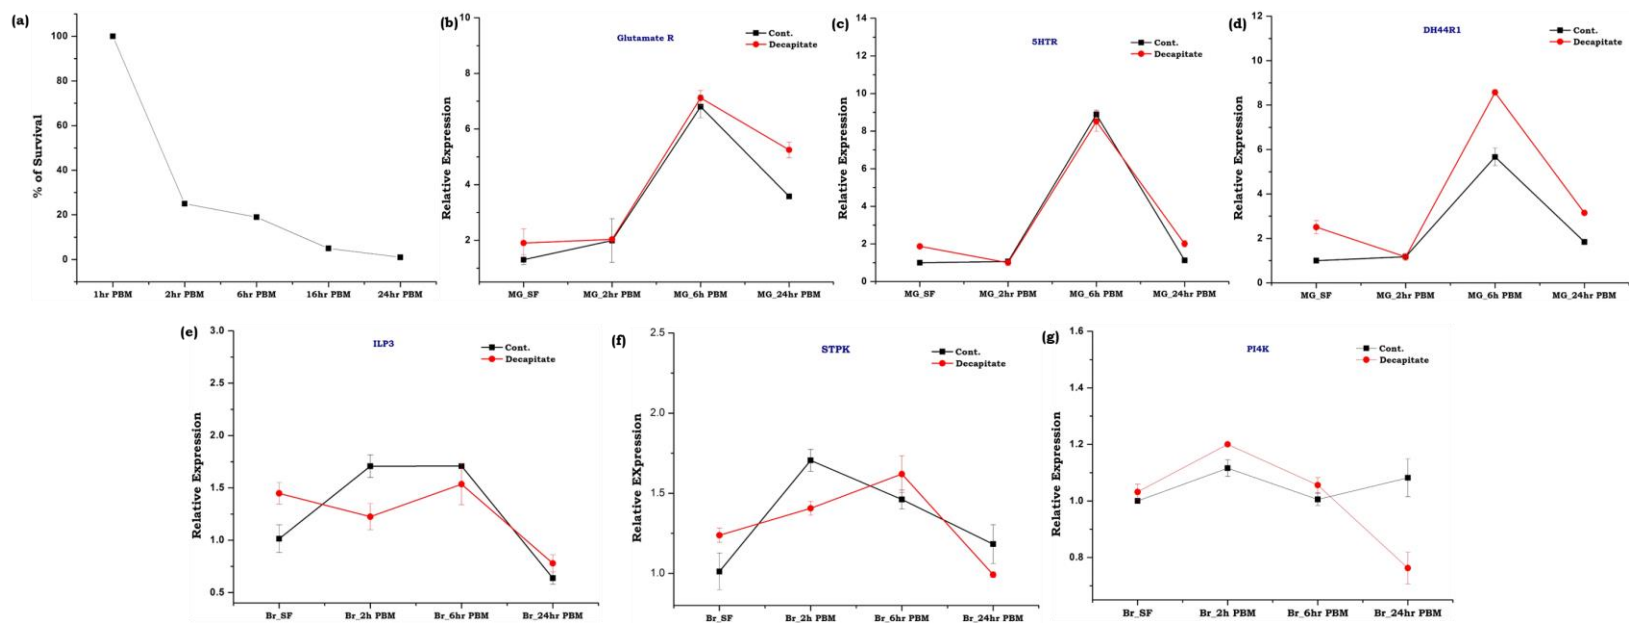

**Figure S3.** Transcriptional Response of neuromodulator receptor genes in naïve and decapitated blood-fed female *An. culicifacies* mosquitoes. (a) Percentage of mosquitoes that survived till 24 h after decapitation which was performed after 1h of blood-feeding. 5-6 days old sugar-fed mosquitoes were provided blood meal and mosquitoes heads were decapitated after 1 h. from the full-fed gravid females. After that, the decapitated mosquitoes were kept in a cage for recovery and count the live (mosquitoes that vibrate/move their legs or other body parts are considered as live) and dead mosquitoes (non-movable mosquitoes with visible shrinkage of the body parts at the respective time points are considered as dead) at different time points until we observed 100% mortality. The percentage of survival was calculated until 24h after blood feeding. (b-d) Relative gene expression analysis of neuromodulator receptor genes in the gut of blood-fed and decapitated female mosquitoes. (e-g) Relative gene expression analysis of neuromodulator receptor genes in the gut of blood-fed and decapitated female mosquitoes. Statistical analysis using two-way ANOVA implied that at 0.05 level the expression level the respective genes in control and decapitated females are not statistically different.

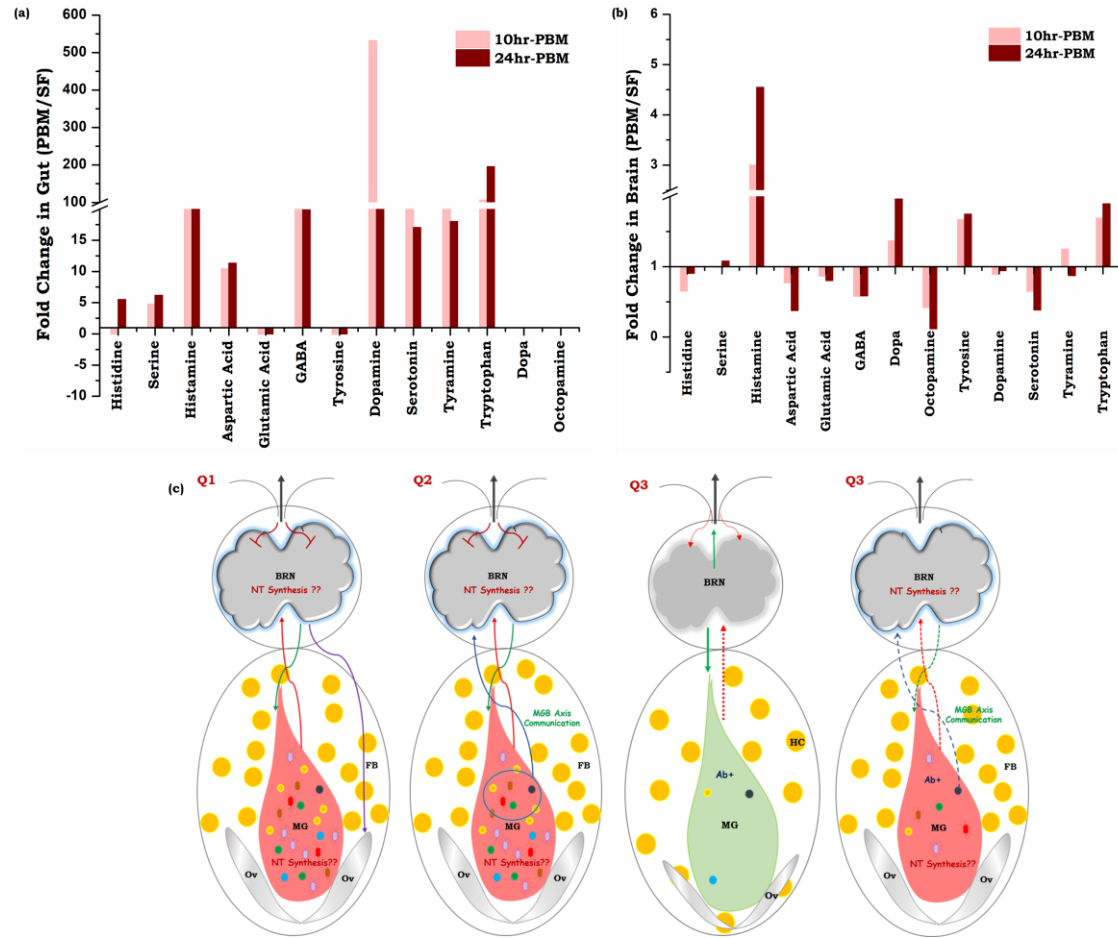

**Figure S4.** (a) Fold change of NT abundance in the gut of blood-fed mosquitoes. (b) Fold change of NT abundance in the brain of blood-fed mosquitoes. (c) Pictorial presentation demonstrating GBA communication in response to gut-metabolic switch in mosquitoes. Q1: Blood-feeding pauses external stimulus-guided neuro-olfactory responses, but may shift brain engagement through the vagus pathway (red arrow) to regulate actions in the distant organs such as the midgut (green arrow) and ovary (purple arrow). Here, we questioned whether increased levels of amino acids in the gut during blood meal digestion may act like an NT. Q2: Do blood-meal-induced gut flora proliferation (different colored shapes indicate diverse microbial flora) influence GBA communication in mosquitoes. Q3: Whether gut-bacterial removal by antibiotic treatment confers the establishment of microbiome-gut-brain axis (MGB) communication. BRN: Brain, MG: midgut, FB: Fat body, Ov: Ovary, Ab+: Antibiotic positive/treated.

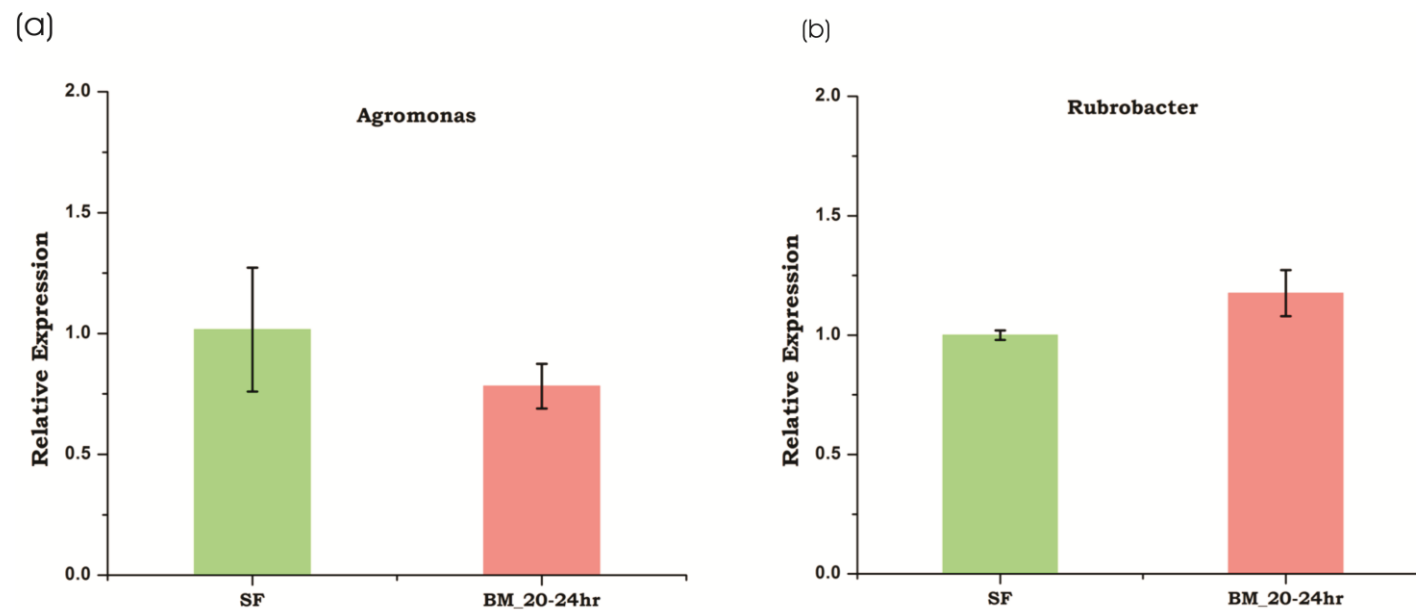

**Figure S5.** Relative expression of *Agromonas* and *Rubrobacter* (gram positive bacteria) at Sugar fed and 20-24hr Post blood fed condition shows no significant change during the two-feeding status.

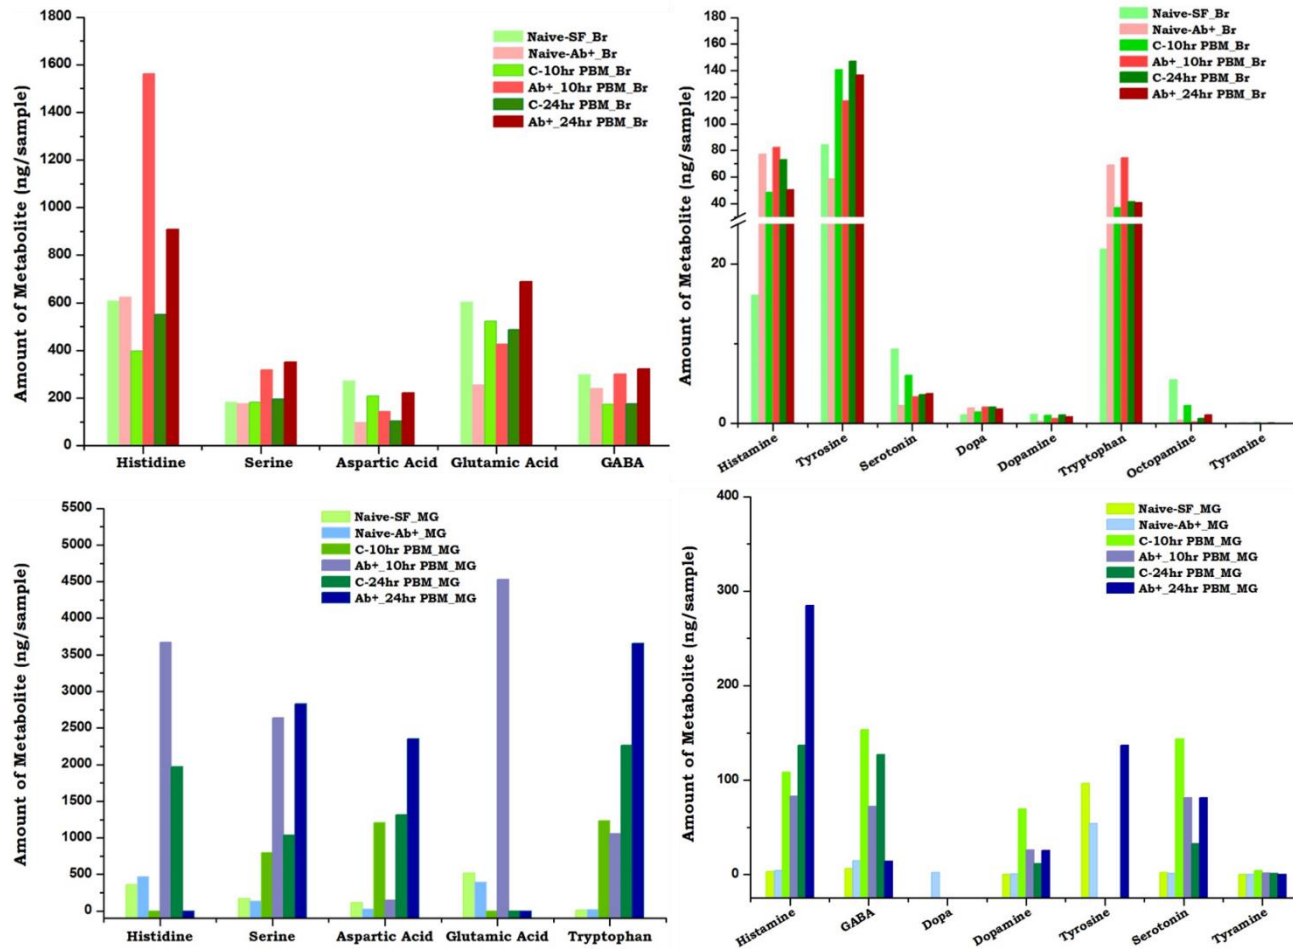

**Figure S6.** Neurotransmitter's dynamics of naïve and aseptic mosquitoes collected from sugar fed and blood fed conditions.

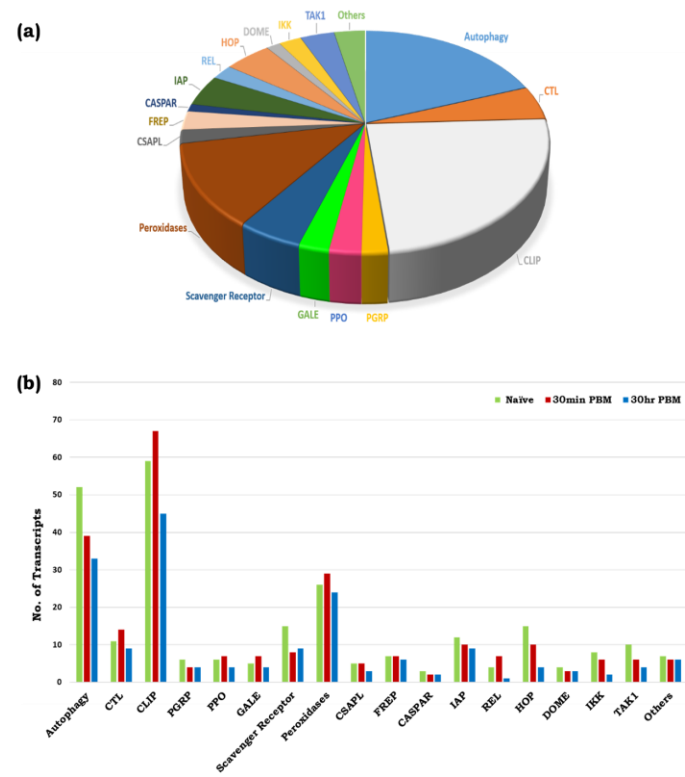

**Figure S7.** Molecular catalog of brain-specific immune transcripts. (a) Molecular catalog of the different classes of immune genes expressed in brain tissue; (b) Differential expression patterns of the brain immunome as determined by the number of sequences that appeared in each RNA-Seq data of naïve and blood-fed mosquito brains.



# Representative UHPLC-MS/SRM chromatogram of Blank:

Relative Abundance

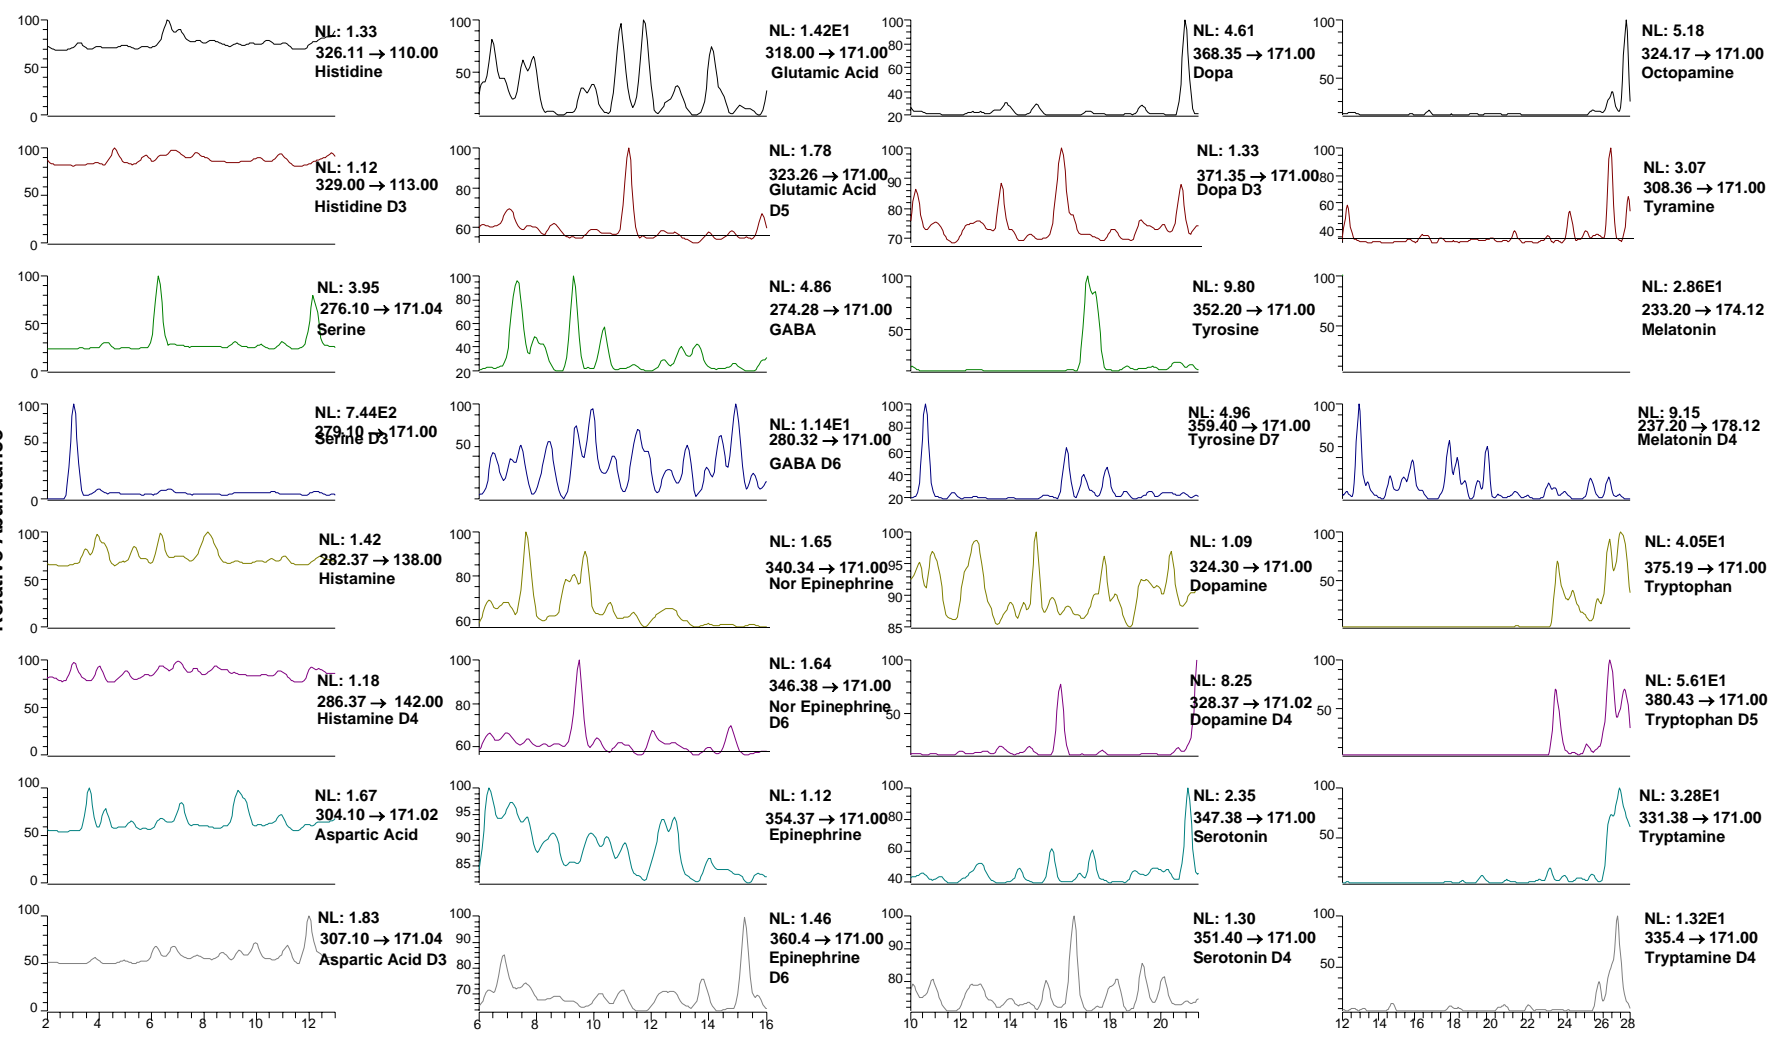

Time (min)

## Representative UHPLC-MS/SRM chromatogram of Standard:

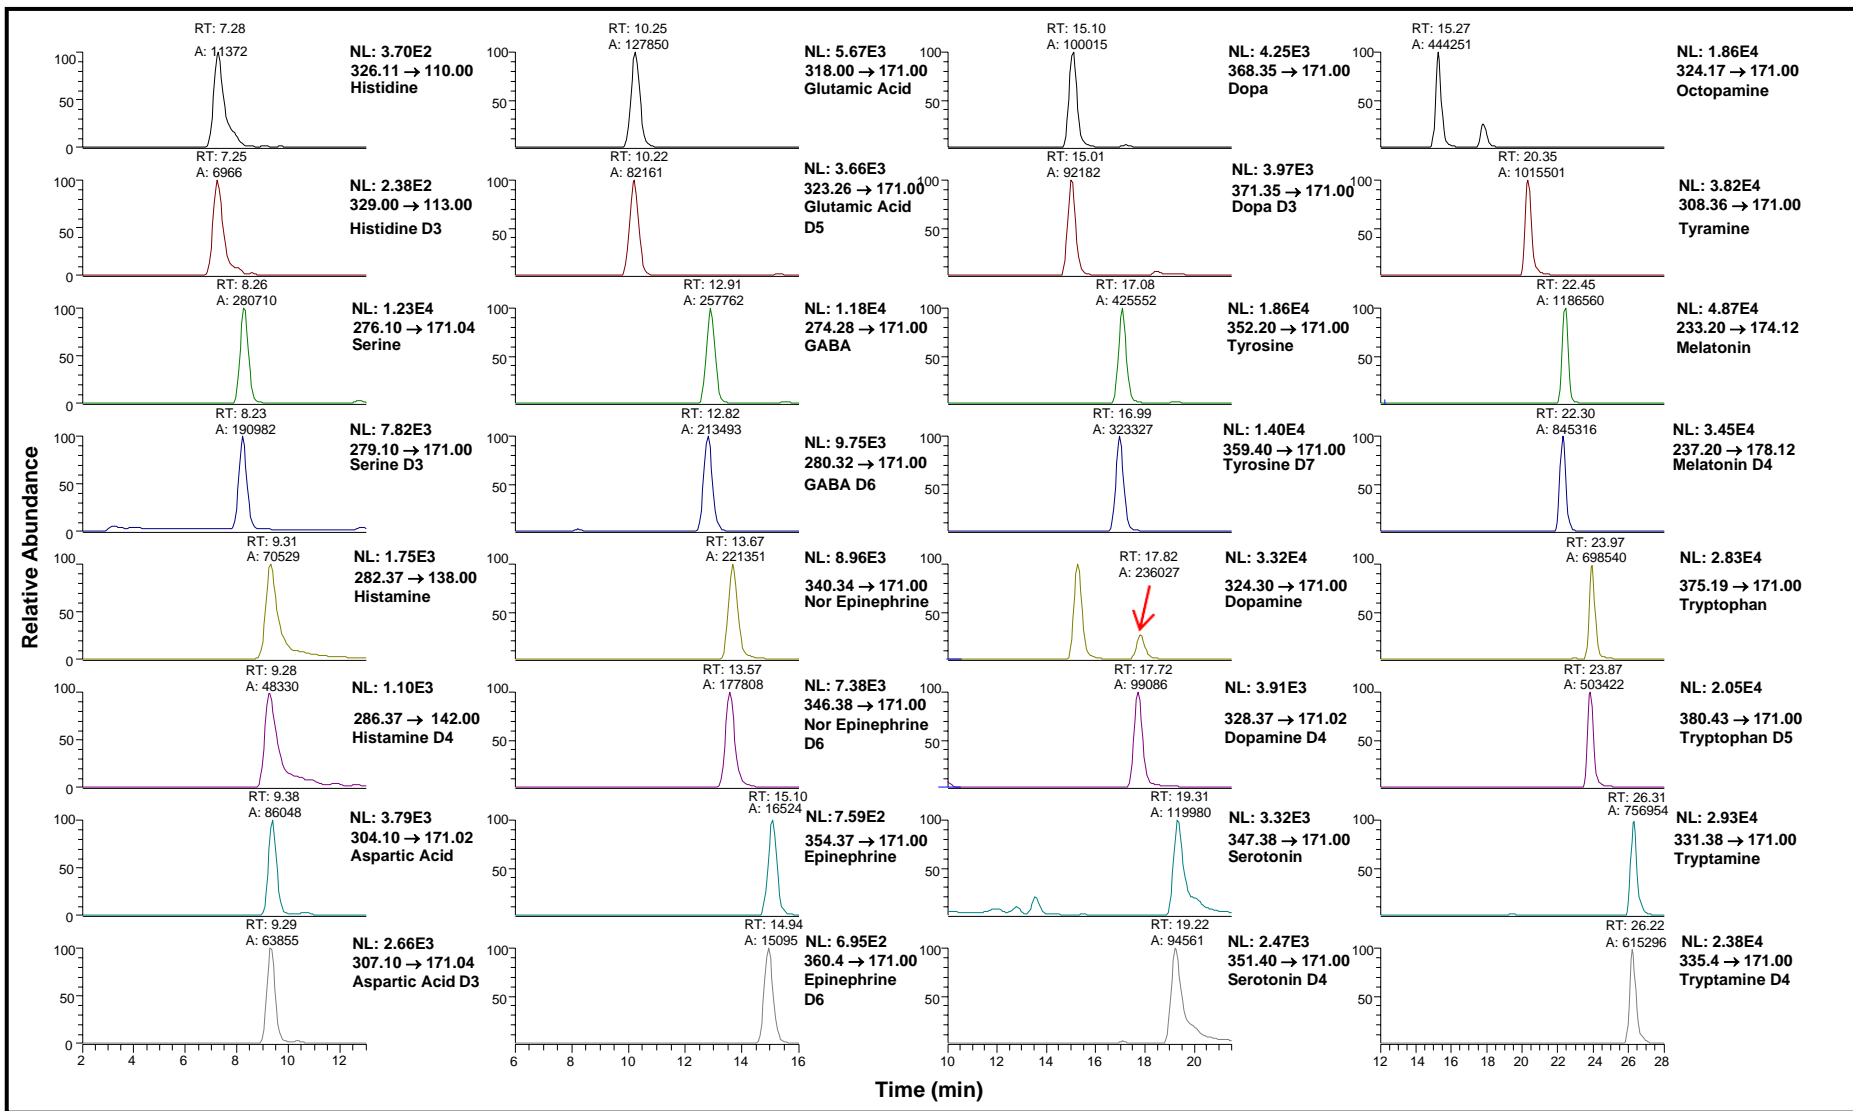

# Representative UHPLC-MS/SRM chromatogram of sample Ac\_SF\_Br:

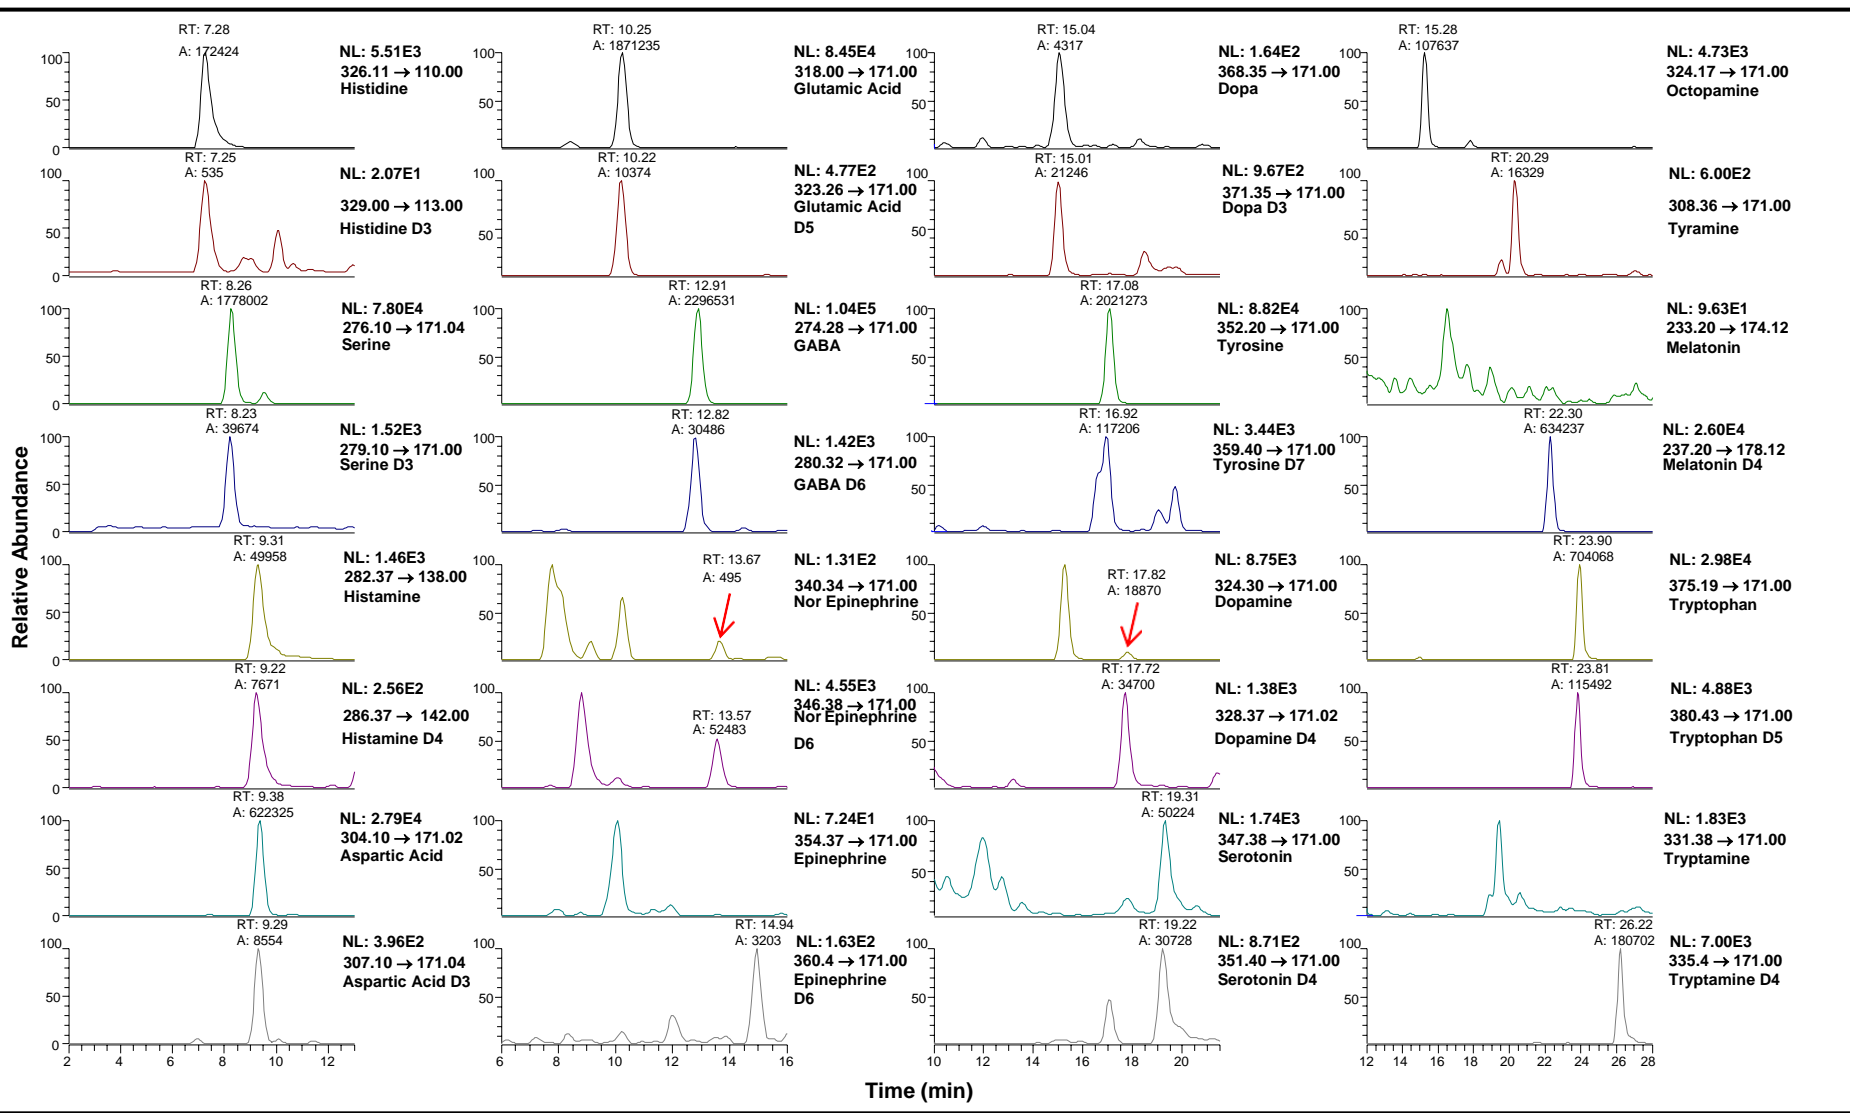

# Representative UHPLC-MS/SRM chromatogram of sample Ac\_SF\_MG:

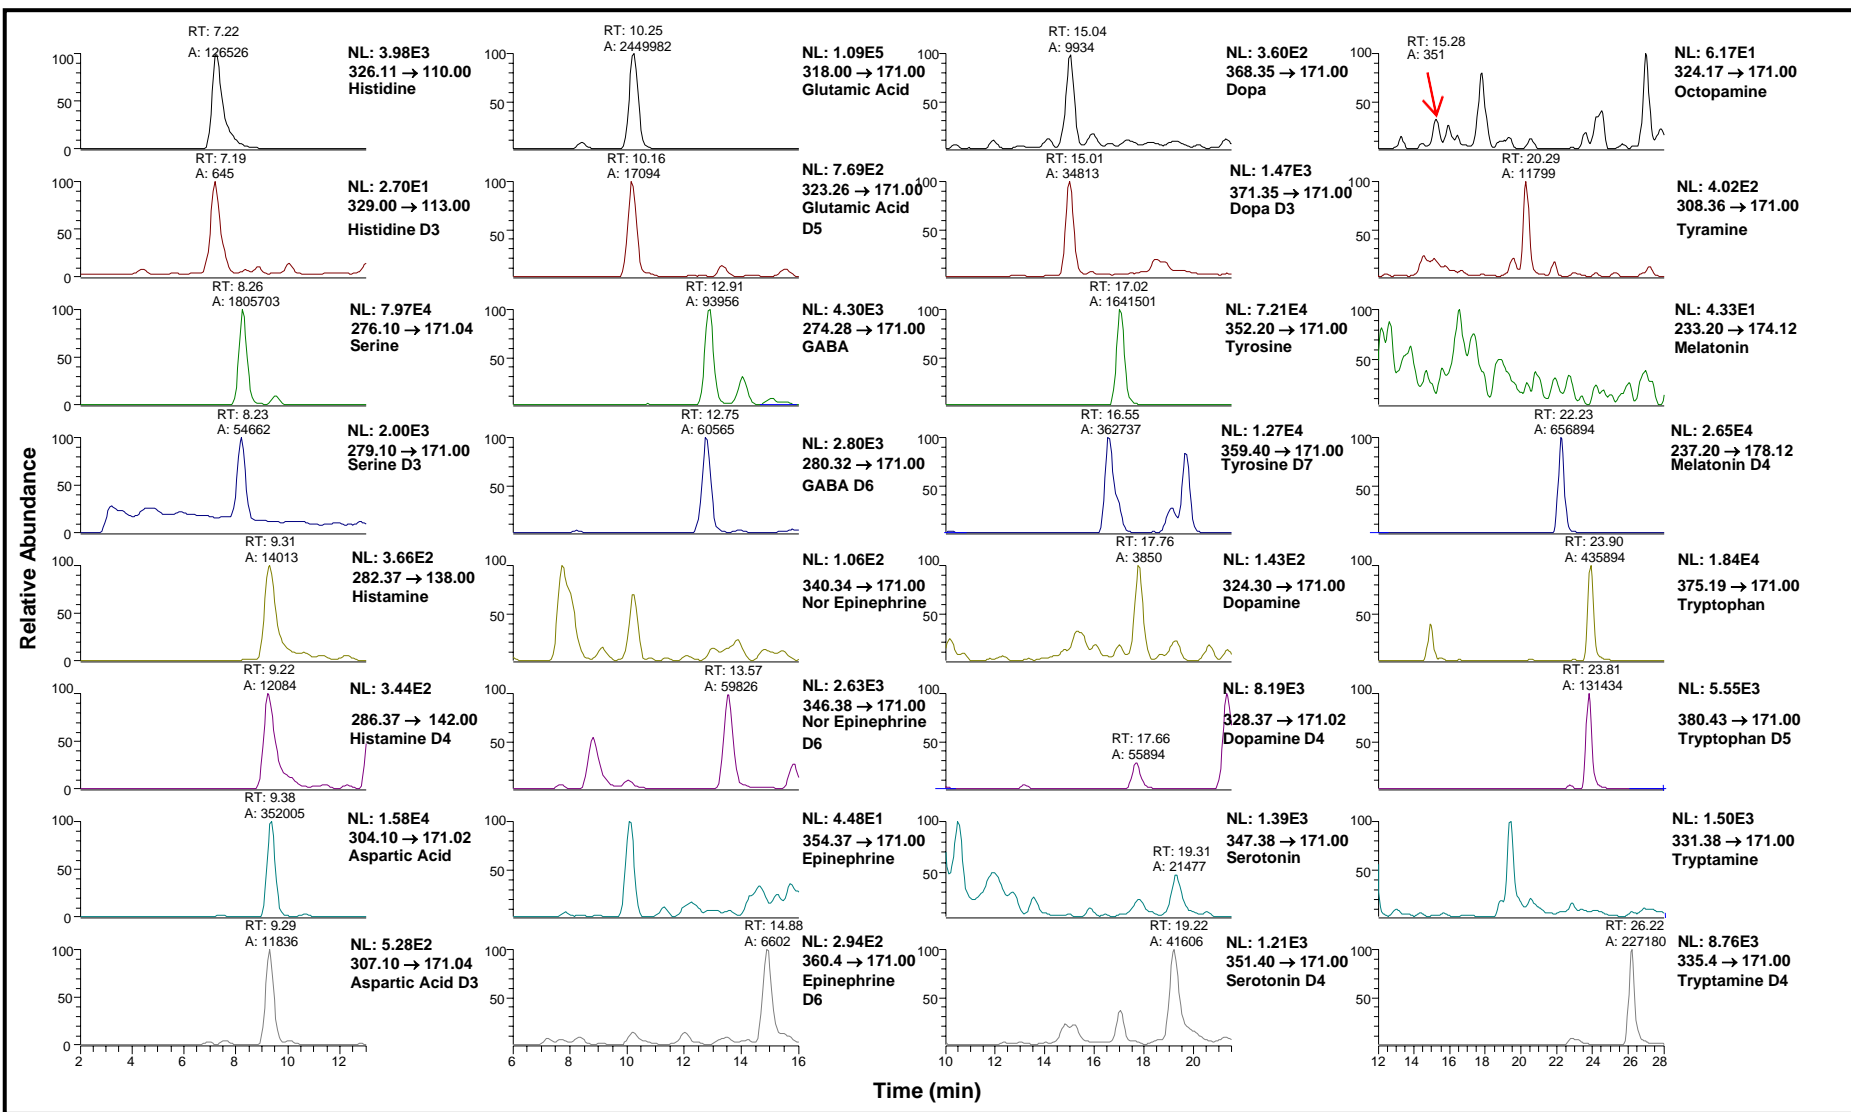

Supplement: s1 [file s1]
